# Supplementary material
Source: Research Square preprint supplement (doi:10.21203/rs.3.rs-9193637/v1)
Supplement: Supplementary file 1 [file 793146d159705aac72319984.docx]

**SUPPLEMENTARY MATERIAL 2. EVIDENCE SEARCH AND BENCHMARK EXTRACTION PROTOCOL (v2)**

**Databases:** PubMed/MEDLINE, Springer, Frontiers, Elsevier ScienceDirect. **Date range:** January 2010–March 2026.

**Search terms:** ("medical affairs" OR "medical science liaison") AND ("return on investment" OR ROI OR "value measurement" OR "cost avoidance" OR "cost of inaction" OR "enterprise risk") for the conceptual framing; ("protocol amendment" AND cost) OR ("launch delay" AND "cost per day") OR ("probability of success" AND "clinical development") for specific benchmarks.

**AI-specific search terms (added in v2):** ("artificial intelligence" OR "machine learning" OR "generative AI") AND ("medical affairs" OR "pharmacovigilance" OR "medical writing" OR "medical information" OR "drug development") for AI-in-MA context; ("artificial intelligence" AND "regulatory submission") OR ("AI" AND "drug safety" AND "automation") for AI adoption evidence and regulatory perspectives.

**Regulatory sources (added in v2):** US FDA discussion papers and draft guidance documents on AI/ML in drug development, accessed via fda.gov and the Federal Register. These were identified through targeted searches rather than database queries.

**Grey-literature sources:** McKinsey, ZS Associates, IQVIA, MAPS, Lucid Group, US FDA; identified through targeted searches of industry publications and professional-society repositories.

**Inclusion criteria:** (a) reported a quantitative parameter directly mappable to a MAVI component; (b) disclosed methodology sufficient for credibility assessment; (c) represented the most recent available estimate for the relevant parameter. For AI-specific sources (added in v2): (d) provided evidence on AI adoption, error rates, governance requirements, or workforce impact relevant to MA operations.

**Exclusion criteria:** Sources that did not report quantitative parameters, reported parameters for non-comparable settings (e.g., device-only without pharmaceutical applicability), or were superseded by more recent peer-reviewed estimates for the same parameter.

**Extraction rules:** When multiple sources reported estimates for the same parameter: (i) peer-reviewed sources took precedence over grey literature; (ii) the most recent estimate was preferred unless an older peer-reviewed source was methodologically stronger; (iii) when estimates conflicted, ranges were retained (not averaged) and carried into sensitivity analysis; (iv) single-source estimates were flagged as such in Table 4 Panel A.

**Credibility classification:**

- High = peer-reviewed methodology with reproducible data;
- Medium = institutional report with stated methods but proprietary data;
- Low = vendor/association collateral with potential commercial bias. Parameters derived from Low-credibility sources are assigned wider uncertainty ranges and labelled “illustrative” throughout.
