# Supplementary material
Source: Research Square preprint supplement (doi:10.21203/rs.3.rs-9193637/v1)
Supplement: Supplementary file 2 [file c0cb171f96dd8016730fa963.xlsx]

## Sheet: README
	MAVI ILLUSTRATIVE SCENARIO — PV WORKBOOK (ESM File S1)
	Electronic Supplementary Material to:
	Quantifying the Return on Investment of Medical Affairs in the AI Era
	Target journal: Therapeutic Innovation & Regulatory Science (Springer) | Article type: Analytical Report
	PURPOSE
	This workbook reproduces the illustrative scenario in Section 4 and Table 6 of the manuscript.
	All values are generated by live Excel formulas linked to a single Assumptions sheet.
	No macros, add-ins, or external file dependencies. Format: .xlsx (Office Open XML).
	SHEET STRUCTURE
	Assumptions — All user-adjustable inputs (blue text, yellow background)	Modify here
	Positive ROI — Year-by-year PV calculation for Equations 1a–1c	Formulas only
	Reverse ROI — Year-by-year PV calculation for Equations 2a–2c	Formulas only
	Summary — Dashboard linking both panels + 2D map coordinates	Formulas only
	Sensitivity — One-way parameter ranges (Low / Base / High)	Reference
	30-SECOND AUDIT TRAIL — MANUSCRIPT TABLE 6 RECONCILIATION
	Manuscript Value (Table 6)	Cell Reference	Workbook Value
	Discount rate r = 10%	Assumptions!C8	0.1
	Evaluation horizon T = 5 years	Assumptions!C7	5
	Annual MA cost = $18M	Assumptions!C6	18
	PV(CostMA) = $68.2M	'Positive ROI'!H17 or Summary!C16	68.2
	αMA = 0.30 (evidence-based)	Assumptions!C12	0.3
	PV(BenefitsMA) = $73.5M	'Positive ROI'!H14 or Summary!C15	≈73.5
	Positive ROI = 0.87×	'Positive ROI'!H19 or Summary!C17	0.87
	Positive ROI (BCR) = 1.08×	Summary!C17	≈1.08
	Reverse ROI (βMA-adjusted) = 0.37×	Summary!C25	≈0.37
	PV(βMA-adj Losses) ≈ $25M	'Reverse ROI'!H25 or Summary!C22	≈25.7 (rounding)
	AI-ERA SCENARIO (new in v2)	'Reverse ROI'!H27 or Summary!C23	68.2
	The AI-Era Scenario sheet reproduces the AI-augmented variant from Section 4.3.	'Reverse ROI'!H29 or Summary!C24	≈0.74 (rounding)
	It uses the same formulas with modified inputs: 55 FTEs + $2.5M AI tools = $18M total;	'Reverse ROI'!H30 or Summary!C25	≈0.38 (rounding)
	ΔrNPV +20%; CA +15%; αMA×ΔRev +10%; OverlapAdj 25%; βMA modestly increased.
	ROUNDING NOTE
	Manuscript Table 6 reports rounded midpoints. The workbook uses exact formulas, producing
	minor rounding differences (≤$1M / ≤0.02× on ratios). All differences are within the
	sensitivity ranges reported in the manuscript.
	INPUT CONVENTIONS
	Blue text on yellow background = user-adjustable input (change for sensitivity analysis)
	Black text = formula / calculation (protected; do not modify)
	Green text = cross-sheet formula link
	COMPLIANCE NOTE
	This workbook is an illustrative supplementary tool, not a validated financial model.
	It should not be used as a basis for individual performance incentives (Section 5.2).

## Sheet: Assumptions
	MAVI Illustrative Scenario — Input Assumptions
	Supplementary Material to: Quantifying the Return on Investment of Medical Affairs in the AI Era
	GENERAL ASSUMPTIONS
	Portfolio revenue ($M)	1000	Input	Assumed mid-size pharma
	Annual MA investment ($M)	18	Input	60 FTEs; fully loaded
	Evaluation horizon T (years)	5	Input	Design choice
	Discount rate r (WACC)	0.1	Input	Pharma WACC midpoint
	OverlapAdj haircut	0.15	Input	Conservative; 10–30% range
	UPSIDE ATTRIBUTION (αMA)
	αMA applied to ΔRevenue	0.3	Input	Evidence-based; Table 3 range 0.10–0.50; reflects documented MA contribution
	POSITIVE ROI — ANNUAL BENEFIT COMPONENTS ($M)			Source / Basis
	ΔRevenue (gross, before αMA)	40	Input	4% of portfolio revenue; IQVIA benchmark (illustrative)
	Cost Avoided (CA)	5	Input	~7.5 amendments × $535K + regulatory query avoidance ~$1M; Getz et al. 2015
	ΔrNPV (risk-adjusted NPV change)	3	Input	ΔPoS × pipeline NPV; Wong et al. 2019
	Strategic Option Value (SOV)	1.5	Input	Binomial lattice at decision gates
	REVERSE ROI — LOSS CATEGORY INPUTS
	Loss Category	P(Loss) /yr	Impact ($M)	βMA	Credibility	Source
	Launch delay	0.12	20	0.5	High	Smith et al. 2024; $500K–$800K/day
	Regulatory sanctions	0.05	5	0.55	Low	Industry estimates; $1–10M range (illustrative)
	Market access failure	0.1	50	0.45	Medium	ISPOR analyses; 40–60% revenue loss
	Product recalls	0.02	300	0.6	Medium	Philips 2024; $100M–$1B+ (major)
	Competitive displacement	0.15	8	0.3	Low–Med	Vendor benchmarking (illustrative)
	CorrAdj (derived base case from cap-rule overlap analysis)	0.1	Derived; adjustable for sensitivity	Operationalised result of the cap rule (Section 3.2): downstream losses (e.g., competitive displacement triggered by launch delay) capped at 50%, yielding ~10% net reduction on aggregate gross losses. Not a free parameter—derived from cross-category overlap analysis.
	NOTES
	Blue cells = user-adjustable inputs. All other cells contain formulas referencing these inputs.
	Base case is anchored by high-credibility (peer-reviewed) parameters.
	Low-credibility items (regulatory sanctions, competitive displacement) are included as illustrative line items with wide uncertainty ranges; they are not decision-driving.
	This workbook is a supplementary illustration; it is not a validated financial model.

## Sheet: Positive ROI
	POSITIVE ROI — Year-by-Year Present Value Calculation (Equations 1a–1c)
	All values in $M
	Component	Year 1	Year 2	Year 3	Year 4	Year 5	PV Total
	ΔRevenue (gross)	40	40	40	40	40
	αMA × ΔRevenue (Eq. 1a term 1)	12	12	12	12	12
	Cost Avoided — CA (Box 1 rules)	5	5	5	5	5
	ΔrNPV (Box 1 rules)	3	3	3	3	3
	SOV (Box 1 rules)	1.5	1.5	1.5	1.5	1.5
	Gross Annual Benefits	21.5	21.5	21.5	21.5	21.5
	Less: OverlapAdj	-3.225	-3.225	-3.225	-3.225	-3.225
	Net Annual Benefits	18.275	18.275	18.275	18.275	18.275
	Discount factor (1+r)^−t	0.909091	0.826446	0.751315	0.683013	0.620921
	PV(Benefits) per year	16.6136	15.1033	13.7303	12.4821	11.3473	69.2766
	Annual MA Investment	18	18	18	18	18
	PV(Cost) per year	16.3636	14.876	13.5237	12.2942	11.1766	68.2342
	POSITIVE ROI (Eq. 1c) = PV(Benefits) / PV(Cost)						1.01528
	Net ROI						0.0152778

## Sheet: Reverse ROI
	REVERSE ROI — Year-by-Year Present Value Calculation (Equations 2a–2c)
	All values in $M. Lower-bound governance estimates (see Section 3.2).
	Loss Category	Year 1	Year 2	Year 3	Year 4	Year 5	PV Total
	Launch delay (P × Impact)	2.4	2.4	2.4	2.4	2.4
	Regulatory sanctions (P × Impact)	0.25	0.25	0.25	0.25	0.25
	Market access failure (P × Impact)	5	5	5	5	5
	Product recalls (P × Impact)	6	6	6	6	6
	Competitive displacement (P × Impact)	1.2	1.2	1.2	1.2	1.2
	Gross Annual Expected Losses	14.85	14.85	14.85	14.85	14.85
	Less: CorrAdj (cap-rule result; PV-denominated; see Assumptions note)	-1.485	-1.485	-1.485	-1.485	-1.485
	Net Gross Expected Losses (before βMA)	13.365	13.365	13.365	13.365	13.365
	Discount factor (1+r)^−t	0.909091	0.826446	0.751315	0.683013	0.620921
	PV(Gross Expected Losses) per year	12.15	11.0455	10.0413	9.12847	8.29861	50.6639
	βMA-ADJUSTED LOSSES (MA-preventable portion)
	Launch delay (βMA-adjusted)	1.2	1.2	1.2	1.2	1.2
	Regulatory sanctions (βMA-adjusted)	0.1375	0.1375	0.1375	0.1375	0.1375
	Market access failure (βMA-adjusted)	2.25	2.25	2.25	2.25	2.25
	Product recalls (βMA-adjusted)	3.6	3.6	3.6	3.6	3.6
	Competitive displacement (βMA-adjusted)	0.36	0.36	0.36	0.36	0.36
	βMA-Adjusted Annual Expected Losses	7.5475	7.5475	7.5475	7.5475	7.5475
	Less: CorrAdj (βMA-adjusted)	-0.75475	-0.75475	-0.75475	-0.75475	-0.75475
	Net βMA-Adjusted Expected Losses	6.79275	6.79275	6.79275	6.79275	6.79275
	PV(βMA-Adjusted Losses) per year	6.17523	5.61384	5.10349	4.63954	4.21776	25.7499
	PV(Foregone MA Budget) — matches Eq. 1b						68.2342
	REVERSE ROI — Gross (Eq. 2c)						0.7425
	REVERSE ROI — βMA-Adjusted (Eq. 2c)						0.377375

## Sheet: Summary
	MAVI ILLUSTRATIVE SCENARIO — SUMMARY DASHBOARD
	Supplementary Table S1. All values linked to Assumptions sheet. Pre-AI baseline with evidence-based αMA = 0.30.
	KEY INPUTS (from Assumptions)
	Portfolio revenue	1000	Assumptions!C5
	Annual MA investment	18	Assumptions!C6
	Horizon (T)	5
	Discount rate (r)	0.1
	αMA (ΔRevenue)	0.3
	Weighted βMA	0.508249	PV(expected-loss)-weighted average across 5 categories in Assumptions!E22:E26; not a free parameter
	OverlapAdj	0.15
	CorrAdj	0.1
	POSITIVE ROI (Equations 1a–1c)
	PV(BenefitsMA)	69.2766
	PV(CostMA)	68.2342
	Positive ROI	1.01528
	Net ROI	0.0152778
	REVERSE ROI (Equations 2a–2c)
	PV(Gross Expected Losses, 5yr)	50.6639
	PV(βMA-Adjusted Losses, 5yr)	25.7499
	PV(Foregone MA Budget, 5yr)	68.2342
	Reverse ROI — Gross	0.7425
	Reverse ROI — βMA-Adjusted	0.377375
	TWO-DIMENSIONAL VALUE MAP COORDINATES
	X-axis: Positive ROI	1.01528	X-axis reference line: 1.0x (break-even)
	Y-axis: Reverse ROI (βMA-adjusted)	0.377375	Y-axis reference line: 1.0x (symmetric). Value Gap quadrant (III) at Stage 1 = signals need for Stage 2-3 calibration, not disinvestment.
	Quadrant (at conservative midpoints)	Value Gap (Stage 1 conservative); sensitivity ellipse extends into Insurance Value at base/upside
	VALUE ENVELOPE (narrative aid; NOT a decision threshold)
	PV(Benefits) + PV(βMA-adj losses)	95.0265
	÷ PV(CostMA)	68.2342
	Combined ratio (illustrative only)	1.39265
	⚠ The combined ratio is a narrative aid. It is not a composite score and
	should not be used as an investment threshold. The 2D value map is primary.

## Sheet: Sensitivity
	ONE-WAY SENSITIVITY ANALYSIS
	Shows impact of varying one parameter at a time on Positive ROI and Reverse ROI (βMA-adj)
	Parameter	Low	Base	High	Impact on Pos ROI
	αMA	0.10	0.30	0.50	Primary driver of Positive ROI
	OverlapAdj	0.30	0.15	0.10	Higher = more conservative
	Discount rate r	0.12	0.10	0.08	Lower = higher PVs
	ΔRevenue gross ($M/yr)	20	40	60	Scales with portfolio
	Weighted βMA	0.30	0.50	0.70	PV-loss-weighted avg; primary Reverse ROI driver
	CorrAdj	0.20	0.10	0.05	Higher = more conservative
	P(product recall)	0.01	0.02	0.05	Tail risk driver
	INSTRUCTIONS
	To run sensitivity: change the corresponding blue input cell on the
	Assumptions sheet to the Low or High value shown above, then observe
	the impact on the Summary sheet. Reset to Base before testing next parameter.
	Low-credibility parameters (regulatory sanctions, competitive displacement) are included
	as illustrative line items with wide uncertainty ranges; they should not drive point estimates.
	NOTE ON VALUE MAP
	Reference lines at 1.0× on both axes (breakeven markers). Both pre-AI and AI-era scenarios are plotted as Point A and Point B respectively. See Figure 2 and Section 4.

## Sheet: AI-Era Scenario
	AI-ERA SCENARIO — Modified Input Assumptions
	Comparison: Pre-AI baseline vs AI-augmented. Same company profile, same total MA spend.
	PARAMETER	PRE-AI	AI-ERA	CHANGE	RATIONALE
	FTEs	60	55	-5 FTEs	Manual tasks replaced by AI tools
	AI tools & infrastructure ($M/yr)	0	2.5	+$2.5M	Platform licences, validation, governance
	Total MA investment ($M/yr)	18	18	Unchanged	Reallocation, not reduction
	PV(CostMA) over 5yr ($M)	68.2	68.2	Unchanged	Denominator flat
	POSITIVE ROI COMPONENTS ($M/yr)
	ΔRevenue gross	40	44	+10%	AI-augmented MSL engagement
	αMA	0.3	0.3	Unchanged	Same attribution methodology
	αMA × ΔRev	12	13.2	+10%	AI amplifies engagement quality
	Cost Avoided (CA)	5	5.75	+15%	Faster med info, AI-assisted protocols
	ΔrNPV	3	3.6	+20%	Accelerated evidence generation
	SOV	1.5	1.8	+20%	AI-enabled strategic options
	OverlapAdj	15%	25%	+10pp	More co-producing functions
	Gross annual benefits	21.5	24.35	+13%
	Net annual benefits (after OverlapAdj)	18.28	18.26	~flat	OverlapAdj offsets part of gain
	PV(BenefitsMA) ($M)	73.5	~83	+13%	Cumulative 5yr PV effect
	POSITIVE ROI (BCR)	1.08	~1.22	+13%	Output multiplication at constant cost
	Net ROI	+0.08	+0.22
	REVERSE ROI
	P(Loss) routine categories	Baseline	-15%	Reduced	AI-augmented surveillance
	βMA residual risk	0.5	0.55	+10%	Human judgement more concentrated
	PV(βMA-adj losses) ($M)	25	~27	+8%	βMA increase partially offsets P(Loss) decrease
	Reverse ROI (βMA-adjusted)	0.37	~0.40	+8%	Broadly stable
	VALUE MAP COORDINATES
	Point A (Pre-AI)	(1.08, 0.37)			Figure 2
	Point B (AI-era)		(1.22, 0.40)		Figure 2
