# Supplementary material
Source: Research Square preprint supplement (doi:10.21203/rs.3.rs-9193637/v1)
Supplement: Supplementary file 2 [file e9757d482a4df87fbf881926.docx]

# SUPPLEMENTARY MATERIAL 3

**Medical Affairs ROI Under Conservative Assumptions: The Case for Two-Dimensional Measurement**

## S3.1 Purpose

The main manuscript presents the Medical Affairs Value Index (MAVI) with evidence-based parameters (αMA = 0.30) and examines how AI modifies each component. This supplement provides the full MAVI illustrative scenario as an independent reference, using both conservative and upside assumptions to demonstrate the two-dimensional value map and its quadrant classification. The scenario is designed to stand alone as a pedagogical tool for finance decision-makers evaluating MA investment.

## S3.2 Company profile

Mid-size pharmaceutical company. US$1 billion portfolio revenue, three marketed products, two label-expansion candidates. Annual MA investment: US$18 million (60 FTEs, fully loaded). Evaluation horizon T = 5 years. Discount rate r = 10% (pharmaceutical WACC midpoint). Full year-by-year present-value calculations are provided in ESM File S1.

## S3.3 Conservative scenario

**Positive ROI (Equation 1c).** PV(BenefitsMA) = US$59.5M, calculated with conservative midpoints: αMA = 0.25 applied to ΔRevenue (operationalised as incremental contribution margin), CA = US$4M/year (protocol amendment avoidance only; regulatory query avoidance excluded), ΔrNPV = US$3M/year, SOV = US$1.5M/year, OverlapAdj = 15%. PV(CostMA) = US$68.2M (US$18M/year × five-year annuity factor at 10%).

**Positive ROI (BCR) = 0.87×** (Net ROI = −0.13). At conservative assumptions, Positive ROI does not exceed cost. This reflects the inherent difficulty of attributing direct financial returns to a knowledge-intensive, co-creation function when attribution governance is absent or underdeveloped.

**Reverse ROI (Equation 2c).** PV(Gross expected losses before βMA) = US$50M (midpoint of US$35–78M range; after CorrAdj). Loss categories include launch delay, regulatory sanctions, market access failure, product recalls, and competitive displacement (Table 4, Panel A of the main manuscript). Applying a weighted-average βMA = 0.50: PV(βMA-adjusted losses) = US$25M. PV(Foregone MA budget) = US$68.2M (matching the Positive ROI denominator).

**Reverse ROI (gross) = 0.73×; Reverse ROI (βMA-adjusted) = 0.37×.** The gross figure represents total enterprise risk exposure from MA elimination; the βMA-adjusted figure captures the share of that risk credibly attributable to MA.

**Total value envelope.** US$68.2M in MA investment generates US$59.5M in directly attributable benefit while preventing US$25–50M in expected losses, implying a total value envelope of approximately US$84–110M against US$68.2M in cost. This envelope is presented to illustrate the two-dimensional nature of MA’s contribution; it should not be treated as a summable composite score.

## S3.4 Upside scenario

The upside scenario represents the same company profile with improved MA investment, more complete attribution governance, and Stage 2–3 probability calibration (see Box 2 of the main manuscript).

*Table S3.1. Conservative vs upside parameter comparison*

| **Parameter** | **Conservative** | **Upside** | **Rationale for upside** |
| --- | --- | --- | --- |
| αMA | 0.25 | 0.40 | Governed attribution through cross-functional calibration panel |
| CA ($M/yr) | 4.0 | 6.0 | Includes regulatory query avoidance and compliance cost savings |
| ΔrNPV ($M/yr) | 3.0 | 5.0 | Stronger evidence programme, higher PoS uplift documented |
| SOV ($M/yr) | 1.5 | 3.0 | Full real-options valuation at decision gates |
| OverlapAdj | 15% | 10% | Better documentation reduces attribution overlap |
| ΔRevenue gross ($M/yr) | 40 | 50 | Expanded portfolio; additional launch support |
| PV(BenefitsMA) | $59.5M | $115M |  |
| PV(CostMA) | $68.2M | $82M | Increased investment: 75 FTEs, broader programme |
| **Positive ROI (BCR)** | **0.87×** | **1.42×** | **Above breakeven with governed attribution** |
| Weighted βMA | 0.50 | 0.60 | Stage 2–3 calibration strengthens attribution |
| PV(Gross losses) | $50M | $85M | Expanded risk scope; Stage 2 probability inputs |
| PV(βMA-adj losses) | $25M | $51M |  |
| **Reverse ROI (gross)** | **0.73×** | **1.30×** | **Above breakeven; losses prevented exceed MA cost** |
| Reverse ROI (βMA-adj) | 0.37× | 0.62× |  |

Under upside assumptions, Positive ROI rises to 1.42× and gross Reverse ROI reaches 1.30×. Both dimensions exceed breakeven: MA generates direct returns above its cost while simultaneously preventing losses that exceed the foregone budget. The upside scenario represents what is achievable with governed attribution, adequate investment, and Stage 2–3 probability calibration — not an aspirational target but a realistic outcome for a well-resourced, well-measured MA function.

## S3.5 The two-dimensional value map

Figure S1 plots both scenarios on the two-dimensional value map. The axes are Positive ROI (BCR) on the horizontal axis and Reverse ROI (gross) on the vertical axis. Reference lines at 1.0× on both axes divide the space into four quadrants:

**Quadrant I — Strategic Asset.** Positive ROI > 1.0× and Reverse ROI > 1.0×. High value creation and high risk protection. MA generates direct returns above cost while preventing losses exceeding its budget. The upside scenario (1.42, 1.30) falls here.

**Quadrant II — Insurance Value.** Positive ROI < 1.0× and Reverse ROI > 1.0×. Modest direct creation but high risk protection. MA is justified primarily by the losses it prevents, analogous to internal audit or cybersecurity.

**Quadrant III — Value Gap.** Positive ROI < 1.0× and Reverse ROI < 1.0×. Below breakeven on both dimensions. The conservative scenario (0.87, 0.74) falls here. This position does not necessarily indicate poor MA performance; it may reflect measurement conservatism (low αMA, incomplete CA documentation, Stage 1 probability inputs) and should trigger diagnostic investigation rather than disinvestment.

**Quadrant IV — Growth Driver.** Positive ROI > 1.0× and Reverse ROI < 1.0×. High direct creation with modest risk protection. MA generates financial returns above cost but the risk-governance dimension is less pronounced.

The dashed ellipse in Figure S1 represents the full parameter uncertainty range spanning both scenarios. The two points are the anchored extremes of a single continuous band: the conservative point reflects the position organisations may observe at initial implementation (Stage 1, with default parameters and incomplete documentation), while the upside point reflects what calibrated, governed measurement can reveal. The arrow indicates the direction of travel as attribution governance matures and measurement parameters are empirically refined.

*Figure S1. Two-dimensional MAVI value map — illustrative scenario.* Filled circle (blue): conservative scenario (Positive ROI = 0.87×; Reverse ROI = 0.74×; Value Gap). Filled square (green): upside scenario (Positive ROI = 1.42×; Reverse ROI = 1.30×; Strategic Asset). Dashed ellipse: full parameter uncertainty range. Arrow: direction of travel with improved MA investment and attribution calibration. BCR, benefit–cost ratio; MA, Medical Affairs.

## S3.6 Interpretation

**The single-dimension trap.** Under conservative assumptions, a finance decision-maker examining only Positive ROI would observe BCR = 0.87× and conclude that MA costs more than it returns. This is the basis for the recurring characterisation of MA as a cost centre. However, this conclusion considers only one dimension. When the Reverse ROI is included, the picture changes: MA prevents enterprise losses with an expected value of US$25–50M, yielding a gross Reverse ROI of 0.73×. The total value envelope (US$84–110M) exceeds the MA investment (US$68.2M), even at conservative assumptions. The “underperformance” was visible only because the measurement was incomplete.

**The diagnostic question.** A Value Gap position should not trigger disinvestment. It should trigger three questions: (1) Is αMA = 0.25 an accurate reflection of MA’s contribution, or a default imposed by the absence of attribution governance? (2) Are all cost-avoidance streams documented and included in the CA component? (3) Is the Reverse ROI being measured at all, and if so, at what calibration stage? When these questions are addressed — as in the upside scenario — the position can shift from Value Gap to Strategic Asset. The distance between the two points in Figure S1 represents a measurement improvement, not necessarily a performance improvement: the underlying value may have been present in both cases.

**Analogy.** MA’s position is analogous to internal audit or cybersecurity: functions whose primary value lies in the adverse outcomes they prevent rather than the direct returns they generate. A single-dimension ROI analysis would undervalue any such function. The two-dimensional value map provides the vocabulary to distinguish between “this function does not deliver value” and “this function delivers value on a dimension we are not measuring.”

**Relevance to the main manuscript.** The main manuscript uses evidence-based parameters (αMA = 0.30, BCR = 1.08× pre-AI) and demonstrates that AI amplifies the Positive ROI further. This supplement shows that even under the most conservative assumptions examined — where Positive ROI falls below breakeven — the Reverse ROI dimension sustains the investment case. The two analyses are complementary: the main manuscript demonstrates what MA delivers with proper measurement; this supplement demonstrates that the case holds even without it.
